# Supplementary material for: Expression of Mitochondrial Progesterone Receptor (PR-M) in Ovarian Cancer and Its Effect on Cell Metastasis Induced by Progesterone
Source: Research Square preprint supplement (doi:10.21203/rs.3.rs-285751/v1), 2021-03-03
Supplement: Supplementary file 1 [file 63dc7ccca09e03ce19eab308.xlsx]

## Sheet: WB数据
样本	癌旁			癌						配对T检验
第一例	1.15	1.097	1.146	1.328	1.43	1.357
第二例	1.139	1.043	1.145	1.175	1.15	1.169
第三例	1.135	1.132	1.23	1.43	1.49	1.473
第四例	1.15	1.16	1.141	1.498	1.412	1.398
第五例	1.126	1.132	1.093	1.412	1.424	1.456
																			1.4	1.38
		第一例	1.15	1.097	1.146	1.328	1.43	1.357
		第二例	1.139	1.043	1.145	1.175	1.15	1.169
		第三例	1.135	1.132	1.23	1.43	1.49	1.473
		第四例	1.15	1.16	1.141	1.498	1.412	1.398
		第五例	1.126	1.132	1.093	1.412	1.424	1.456

## Sheet: CCK-8
	0			10^-8			10^-7			10^-6					two-way ANOVA检验
0	0.165	0.176	0.171	0.173	0.169	0.165	0.176	0.177	0.163	0.211	0.19	0.178
24	0.287	0.279	0.264	0.268	0.278	0.271	0.266	0.29	0.283	0.331	0.374	0.341
48	0.6902	0.7647	0.8139	0.8042	0.7559	0.868	0.9039	0.8666	0.9602	0.9634	0.9553	0.976
72	1.063	1.089	1.027	1.032	1.094	1.103	1.243	1.219	1.187	1.363	1.289	1.327

## Sheet: 组织PCR整理
非癌			癌						非配对T检验
0.974905	0.860551	1.2086	1.29534	0.903335	0.860551
0.285851	0.295931	0.285851	0.474123	0.457973	0.412748
0.319944	0.331189	0.310448	0.183448	0.192798	0.174999
0.228458	0.186856	0.186856	0.277392	0.392292	0.287175
0.432988	0.415724	0.433052	1.02298	1.02798	1.07956
0.640308	0.648311	0.610277	1.03829	1.04227	1.17485
0.137597	0.131889	0.127371	0.557674	0.584167	0.527603
0.191453	0.178601	0.19536	0.771935	0.862172	0.769732
0.336333	0.356415	0.317804	0.778053	0.743705	0.750946
0.451315	0.462513	0.471268	1.42896	1.32784	1.18002
0.191666	0.198425	0.170361	0.288505	0.282567	0.280616
0.66742	0.627056	0.658231	0.577009	0.627056	0.601513
0.18332	0.217426	0.223626	0.277333	0.295128	0.287381
0.10178	0.114116	0.102277	0.133634	0.136329	0.135454
0.162434	0.177707	0.177084	0.101289	0.112552	0.113198
1.12766	1.18372	1.09682	0.83702	0.935191	0.988514
0.223297	0.219695	0.19104	0.701593	0.686051	0.506528
0.435468	0.621022	0.511756	1.4764	1.61349	1.52471
0.505297	0.455735	0.491227	1.43901	1.53424	1.72356
0.285206	0.265873	0.254521	0.571932	0.53655	0.582025
0.0635079	0.0424964	0.0401336	0.152817	0.145112	0.19029
0.145464	0.129133	0.120155	0.320943	0.362564	0.323331
0.0574902	0.0594075	0.0764148	0.252434	0.293336	0.211703
0.116899	0.100365	0.100365	0.200731	0.222725	0.215138
0.0557637	0.0534233	0.0550706	0.136734	0.114073	0.110894
0.355355	0.365354	0.354932	0.295993	0.296111	0.324782
0.108658	0.115661	0.120757	0.31474	0.297207	0.305832
0.0244617	0.0375945	0.0277122	0.0598156	0.056589	0.0650037
0.135216	0.130308	0.144586	0.164178	0.136787	0.149685
0.191666	0.198425	0.170361	0.288505	0.282567	0.277333

## Sheet: 细胞PCR
细胞类型	PR-M(CT)	actin (CT)	△Ct	空白△Ct均值	-△△Ct	2-△△Ct	2-△△Ct均值					one-way ANOVA检验
IOSE-80	31.65	20.24	11.41	11.48	0.07	1.04972	1.00232
IOSE-80	31.77	20.15	11.62		-0.14	0.907519
IOSE-80	31.99	20.58	11.41		0.07	1.04972
3A0	25.56	15.52	10.04		1.44	2.71321	2.71321
3AO	25.62	15.44	10.18		1.3	2.46229
3AO	25.99	15.6	10.39		1.09	2.12874
ES-2	26.08	16.57	9.51		1.97	3.91768	3.91768
ES-2	26.05	16.45	9.6		1.88	3.68075
ES-2	25.88	16.33	9.55		1.93	3.81055
SKOV3	27.5	18.38	9.12		2.36	5.1337	5.1337
SKOV3	27.71	18.29	9.42		2.06	4.16986
SKOV3	27.88	18.42	9.46		2.02	4.05584
HO8910	26.68	16.71	9.97		1.51	2.8481	2.8481
HO8910	26.58	16.41	10.17		1.31	2.47942
HO8090	26.49	16.84	9.65		1.83	3.55537

## Sheet: 划痕
			two-way ANOVA检验				对照组			实验组
						24h	0.466741	0.436695	0.479217	0.285872	0.26706	0.255046
						48h	0.260049	0.273231	0.286127	0.125344	0.191569	0.160861
